# Supplementary material for: RP-HPLC-Based Flavonoid Profiling Accompanied with Multivariate Analysis: An Efficient Approach for Quality Assessment of Houttuynia cordata Thunb Leaves and Their Commercial Products
Source: MDPI journal article supplement (doi:10.3390/molecules28176378), 2023-08-31
Supplement: s1 [file s1]

# RP-HPLC-Based Flavonoid Profiling Accompanied with Multivariate Analysis: An Efficient Approach for Quality Assessment of *Houttuynia cordata* Thunb Leaves and Their Commercial Products

Minh Hien Nguyen <sup>1,2,\*</sup>, Dieu Ly Ha <sup>1,2</sup>, Binh Minh Do <sup>1,2</sup>, Ngoc Trong Nghia Chau <sup>1,2</sup>, Thi Huong Tran <sup>1,2</sup>, Nguyen Thien Han Le <sup>1,2</sup> and Minh Tri Le <sup>1,2,3,\*</sup>

<sup>1</sup> School of Medicine, Vietnam National University Ho Chi Minh City, Quarter 6, Linh Trung Ward, Thu Duc District, Ho Chi Minh City 700000, Vietnam; hdly@medvnu.edu.vn (D.L.H.); dbminh.d2017@medvnu.edu.vn (B.M.D.); cntnghia.d2017@medvnu.edu.vn (N.T.N.C.); tthuong.duoc2016@medvnu.edu.vn (T.H.T.); lnthan.d2019@medvnu.edu.vn (N.T.H.L.)

<sup>2</sup> Vietnam National University Ho Chi Minh City, Quarter 6, Linh Trung Ward, Thu Duc District, Ho Chi Minh City 700000, Vietnam

<sup>3</sup> Faculty of Pharmacy, University of Medicine and Pharmacy of Ho Chi Minh City, Dinh Tien Hoang Street, Ben Nghe Ward, 1 District, Ho Chi Minh City 700000, Vietnam

\* Correspondence: nmhien@medvnu.edu.vn (M.H.N.); lmtri@medvnu.edu.vn or leminhtri@ump.edu.vn (M.T.L.); Tel.: +84373-696-894 (M.H.N)

## Supplementary

**Table S1** Information on collecting *H. cordata* leaves from different regions in Vietnam from January to March, 2022

| Code | Address (Commune, District)   | Province        | Region              | Time collect | Location coordinates          |
|------|-------------------------------|-----------------|---------------------|--------------|-------------------------------|
| HC01 | Loi Binh Nhon, Tan An         | Long An         | Mekong Delta        | Jan 2022     | 10°32'14.6"N<br>106°22'30.9"E |
| HC02 | Yen Do, Pleiku                | Gia Lai         | Central Highlands   | Feb 2022     | 13°58'52.7"N<br>107°59'34.4"E |
| HC03 | Ka Don, Don Duong             | Lam Dong        | Central Highlands   | Feb 2022     | 11°43'39.3"N<br>108°29'58.8"E |
| HC04 | Vinh Quang, Rach Gia          | Kien Giang      | Mekong Delta        | Jan 2022     | 10°02'34.7"N<br>105°04'42.1"E |
| HC05 | Dong Tam, Hai Ba Trung        | Ha Noi          | Red River Delta     | Jan 2022     | 20°59'54.5"N<br>105°50'45.4"E |
| HC06 | Sub-village 10, Bac Lieu city | Bac Lieu        | Mekong Delta        | Jan 2022     | 9°18'13.6"N<br>105°44'13.8"E  |
| HC07 | Dong Cuu, Gia Binh            | Bac Ninh        | Red River Delta     | Feb 2022     | 21°04'02.6"N<br>106°09'13.5"E |
| HC08 | Xuan Phu, Hue city            | Hue             | North Central Coast | Jan 2022     | 16°27'52.2"N<br>107°36'00.8"E |
| HC09 | Thoi Hoa, O Mon               | Can Tho         | Mekong Delta        | Feb 2022     | 10°07'09.0"N<br>105°37'12.7"E |
| HC10 | Long Tien, Cai Lay            | Tien Giang      | Mekong Delta        | Jan 2022     | 10°21'07.8"N<br>106°08'20.4"E |
| HC11 | Vinh Thanh, Lap Vo            | Dong Thap       | Mekong Delta        | Feb 2022     | 10°19'47.2"N<br>105°37'31.7"E |
| HC12 | My Thuy, Le Thuy              | Quang Binh      | North Central Coast | Feb 2022     | 17°11'54.4"N<br>106°48'41.8"E |
| HC13 | Nam Trung, Tien Hai           | Thai Binh       | Mekong Delta        | Feb 2022     | 20°20'00.2"N<br>106°32'25.6"E |
| HC14 | Cam Hieu, Cam Lo              | Quang Tri       | North Central Coast | Feb 2022     | 16°48'17.9"N<br>107°02'18.6"E |
| HC15 | Tam Ngoc, Tam Ky              | Quang Nam       | South Central Coast | Feb 2022     | 15°31'50.9"N<br>108°29'03.0"E |
| HC16 | Hoa Tho Tay, Cam Le           | Da Nang         | South Central Coast | Feb 2022     | 16°00'56.2"N<br>108°10'39.8"E |
| HC17 | Dak Nia, Gia Nghia            | Dak Nong        | Central Highlands   | Feb 2022     | 11°57'09.0"N<br>107°42'28.9"E |
| HC18 | Song Ray, Cam My              | Dong Nai        | South East          | Mar 2022     | 10°44'49.1"N<br>107°18'36.0"E |
| HC19 | Khoi 5, Tan Ky                | Nghe An         | North Central Coast | Mar 2022     | 19°09'46.6"N<br>105°18'20.6"E |
| HC20 | Duc Thuan, Hong Linh          | Ha Tinh         | North Central Coast | Mar 2022     | 18°31'49.9"N<br>105°41'24.7"E |
| HC21 | Dien Son, Dien Khanh          | Khanh Hoa       | South Central Coast | Mar 2022     | 12°16'21.7"N<br>109°04'56.7"E |
| HC22 | An Ninh, Chau Thanh           | Soc Trang       | Mekong Delta        | Mar 2022     | 9°36'37.2"N<br>105°54'02.3"E  |
| HC23 | Phu Thanh, Tuy Hoa            | Phu Yen         | South Central Coast | Mar 2022     | 13°01'59.1"N<br>109°19'21.2"E |
| HC24 | Binh Tan, La Gi               | Binh Thuan      | South East          | Mar 2022     | 10°66'71.6"N<br>107°78'01.8"E |
| HC25 | Kien Thanh, Cho Moi           | An Giang        | Mekong Delta        | Mar 2022     | 10°31'15.6"N<br>105°24'19.7"E |
| HC26 | Phuoc Tan, Xuyen Moc          | Ba Ria-Vung Tau | South East          | Mar 2022     | 10°33'52.7"N<br>107°23'05.2"E |

|      |                            |            |                   |          |                               |
|------|----------------------------|------------|-------------------|----------|-------------------------------|
| HC27 | Phuoc Huu, Ninh Phuoc      | Ninh Thuan | South East        | Feb 2022 | 11°30'33.2"N<br>108°52'45.4"E |
| HC28 | Truong Chinh, Kon Tum city | Kon Tum    | Central Highlands | Mar 2022 | 14°22'40.6"N<br>108°00'52.1"E |
| HC29 | Rach Goc, Ngoc Hien        | Ca Mau     | Mekong Delta      | Mar 2022 | 8°39'15.0"N<br>105°02'44.9"E  |
| HC30 | Chau Binh, Giong Trom      | Ben Tre    | Mekong Delta      | Apr 2022 | 10°11'28.8"N<br>106°33'21.5"E |
| HC31 | Song Mai, Bac Giang city   | Bac Giang  | Northeast         | Apr 2022 | 21°18'30.6"N<br>106°10'52.0"E |
| HC32 | Huu Bang, Kien Thuy        | Hai Phong  | Red River Delta   | Mar 2022 | 20°46'18.7"N<br>106°39'28.4"E |

**Table S2** Samples of *H. cordata* powder available in market

| Code | Brand       | Drying method  |
|------|-------------|----------------|
| P01  | Goce        | Hot air drying |
| P02  | Quang Thanh | Freeze-drying  |
| P03  | Behena      | Freeze-drying  |
| P04  | Dalahouse   | Freeze-drying  |

**Table S3** Extracted Eigenvectors

|               | Coefficients of PC1 | Coefficients of PC2 |
|---------------|---------------------|---------------------|
| Rutin         | 0.48052             | -0.30623            |
| Hyperin       | 0.5115              | 0.07328             |
| Isoquercitrin | 0.48967             | -0.0542             |
| Quercitrin    | 0.47659             | -0.11178            |
| Quercetin     | 0.20137             | 0.94097             |

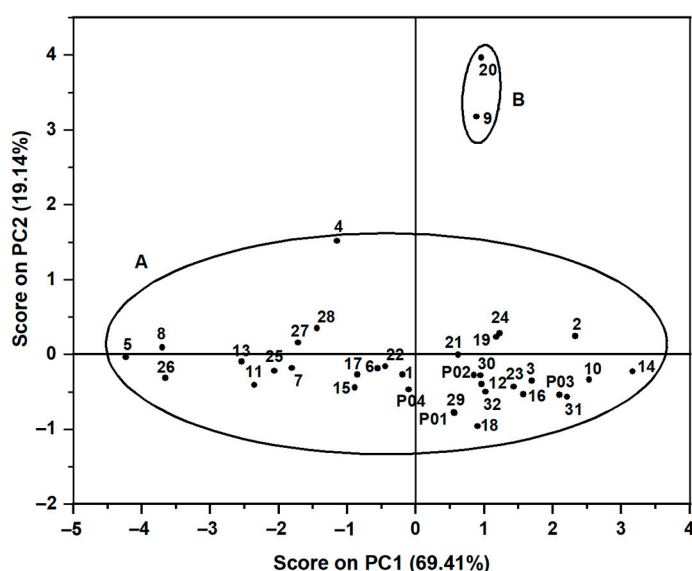

**Figure S1** The scores plot presents the distribution of *H. cordata* leaves samples on the same plane as well as the correlation between them and the first and second principal components (by analyzing five flavonoids).

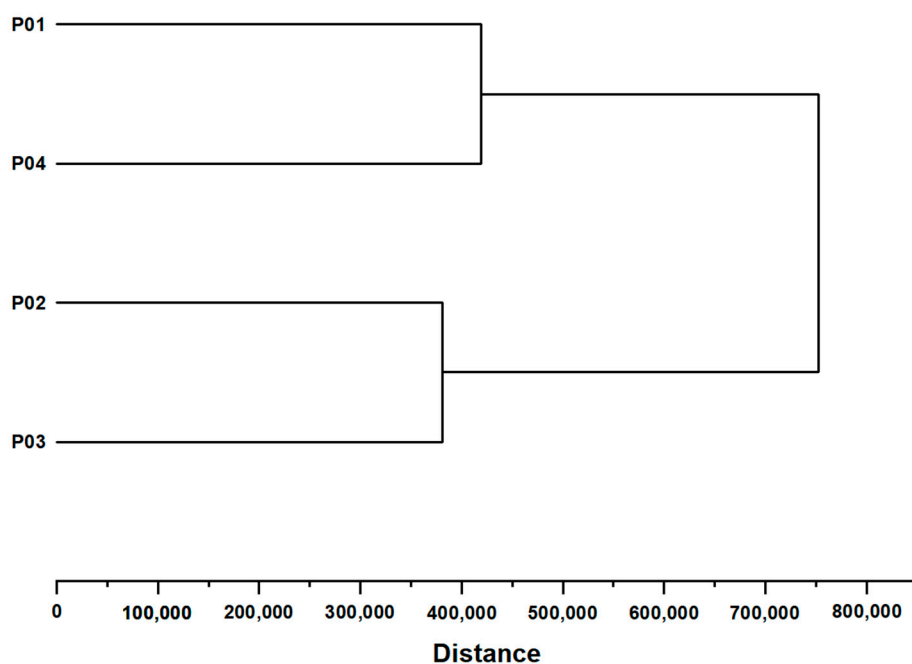

**Figure S2** Hierarchical cluster analysis of four *H. cordata* commercial products.

**Table S4** Average hyperin and quercetin content of each seven groups.

|         | Hyperin               | Quercetin             |
|---------|-----------------------|-----------------------|
| Group A | $1.26886 \pm 0.13372$ | $0.02446 \pm 0.00423$ |
| Group B | $1.70697 \pm 0.07343$ | $0.03368 \pm 0.00593$ |
| Group C | $1.65627 \pm 0.03986$ | $0.11955 \pm 0.00694$ |
| Group D | $2.13208 \pm 0.04998$ | $0.03743 \pm 0.00877$ |
| Group E | $0.55360 \pm 0.09061$ | $0.02854 \pm 0.01715$ |
| Group F | $0.82082 \pm 0.01183$ | $0.02325 \pm 0.00174$ |
| Group G | $0.14607 \pm 0.08867$ | $0.01079 \pm 0.00430$ |

**Table S5** Similarity of HPLC-based flavonoid profiling chromatograms of *Houttuynia cordata* leaves.

| HC01HC02HC03HC04HC05HC06HC07HC08HC09HC10HC11HC12HC13HC14HC15HC16HC17HC18HC19HC20HC21HC22HC23HC24HC25HC26HC27HC28HC29HC30HC31HC32 P01 P02 P03 P04                                                                      |
|-----------------------------------------------------------------------------------------------------------------------------------------------------------------------------------------------------------------------|
| HC01 1.000                                                                                                                                                                                                            |
| HC02 0.992 1.000                                                                                                                                                                                                      |
| HC03 0.999 0.994 1.000                                                                                                                                                                                                |
| HC04 0.992 0.968 0.986 1.000                                                                                                                                                                                          |
| HC05 0.996 0.982 0.994 0.995 1.000                                                                                                                                                                                    |
| HC06 0.997 0.999 0.997 0.979 0.988 1.000                                                                                                                                                                              |
| HC07 0.997 0.979 0.993 0.998 0.995 0.988 1.000                                                                                                                                                                        |
| HC08 0.776 0.847 0.798 0.692 0.749 0.819 0.725 1.000                                                                                                                                                                  |
| HC09 0.993 0.995 0.992 0.978 0.990 0.997 0.984 0.814 1.000                                                                                                                                                            |
| HC10 0.998 0.997 0.997 0.983 0.991 1.000 0.991 0.807 0.998 1.000                                                                                                                                                      |
| HC11 0.997 0.978 0.993 0.999 0.996 0.987 1.000 0.722 0.984 0.990 1.000                                                                                                                                                |
| HC12 0.998 0.984 0.997 0.996 0.996 0.991 0.999 0.747 0.986 0.993 0.999 1.000                                                                                                                                          |
| HC13 0.992 0.969 0.989 0.998 0.995 0.978 0.998 0.703 0.975 0.982 0.998 0.997 1.000                                                                                                                                    |
| HC14 0.999 0.987 0.998 0.995 0.997 0.993 0.999 0.758 0.990 0.995 0.999 1.000 0.996 1.000                                                                                                                              |
| HC15 0.996 0.980 0.996 0.994 0.995 0.986 0.997 0.743 0.980 0.989 0.997 0.999 0.998 0.998 1.000                                                                                                                        |
| HC16 0.999 0.995 1.000 0.986 0.994 0.998 0.993 0.801 0.994 0.998 0.993 0.996 0.988 0.998 0.994 1.000                                                                                                                  |
| HC17 0.998 0.998 0.998 0.982 0.990 1.000 0.990 0.810 0.996 1.000 0.989 0.993 0.982 0.995 0.989 0.999 1.000                                                                                                            |
| HC18 0.997 0.995 0.998 0.981 0.987 0.997 0.991 0.806 0.989 0.997 0.989 0.994 0.984 0.995 0.992 0.998 0.998 1.000                                                                                                      |
| HC19 0.990 0.999 0.990 0.965 0.978 0.998 0.977 0.844 0.996 0.997 0.975 0.981 0.964 0.984 0.974 0.992 0.997 0.992 1.000                                                                                                |
| HC20 0.917 0.956 0.920 0.868 0.900 0.945 0.885 0.925 0.952 0.940 0.884 0.894 0.861 0.904 0.881 0.926 0.938 0.924 0.962 1.000                                                                                          |
| HC21 0.996 0.998 0.995 0.979 0.989 1.000 0.987 0.817 0.999 1.000 0.986 0.990 0.978 0.993 0.985 0.997 0.999 0.995 0.998 0.948 1.000                                                                                    |
| HC22 1.000 0.994 0.998 0.989 0.993 0.998 0.995 0.786 0.995 0.999 0.994 0.997 0.988 0.998 0.993 0.999 0.999 0.998 0.993 0.926 0.998 1.000                                                                              |
| HC23 0.999 0.996 0.998 0.985 0.991 0.999 0.993 0.799 0.995 1.000 0.992 0.995 0.985 0.996 0.991 0.999 1.000 0.998 0.995 0.933 0.999 1.000 1.000                                                                        |
| HC24 0.990 0.999 0.990 0.965 0.978 0.998 0.977 0.844 0.996 0.997 0.975 0.981 0.964 0.984 0.974 0.992 0.997 0.992 1.000 0.962 0.998 0.993 0.995 1.000                                                                  |
| HC25 0.991 0.967 0.988 0.998 0.992 0.977 0.998 0.694 0.972 0.981 0.998 0.997 1.000 0.995 0.997 0.987 0.981 0.983 0.963 0.857 0.976 0.988 0.984 0.963 1.000                                                            |
| HC26 1.000 0.990 0.999 0.993 0.996 0.995 0.997 0.771 0.991 0.997 0.997 0.999 0.994 1.000 0.998 0.999 0.997 0.997 0.987 0.910 0.994 0.999 0.998 0.987 0.993 1.000                                                      |
| HC27 0.992 0.969 0.990 0.997 0.994 0.978 0.997 0.708 0.974 0.982 0.998 0.997 1.000 0.996 0.999 0.988 0.982 0.985 0.964 0.861 0.977 0.988 0.985 0.964 0.999 0.994 1.000                                                |
| HC28 0.992 0.969 0.990 0.997 0.994 0.978 0.997 0.708 0.974 0.982 0.998 0.997 1.000 0.996 0.999 0.988 0.982 0.985 0.964 0.861 0.977 0.988 0.985 0.964 0.999 0.994 1.000 1.000                                          |
| HC29 0.981 0.968 0.983 0.971 0.967 0.973 0.983 0.746 0.955 0.973 0.980 0.985 0.981 0.982 0.988 0.981 0.977 0.987 0.962 0.858 0.968 0.979 0.979 0.962 0.982 0.983 0.983 0.983 1.000                                    |
| HC30 0.999 0.993 0.998 0.989 0.992 0.998 0.996 0.782 0.993 0.999 0.995 0.997 0.989 0.998 0.994 0.998 0.999 0.998 0.992 0.922 0.997 1.000 1.000 0.992 0.989 0.999 0.989 0.989 0.982 1.000                              |
| HC31 0.973 0.994 0.977 0.935 0.955 0.988 0.952 0.895 0.983 0.984 0.950 0.960 0.937 0.964 0.954 0.979 0.985 0.982 0.994 0.976 0.987 0.977 0.982 0.994 0.934 0.969 0.938 0.938 0.948 0.976 1.000                        |
| HC32 1.000 0.992 0.999 0.992 0.996 0.996 0.997 0.775 0.993 0.998 0.997 0.999 0.992 1.000 0.996 0.999 0.998 0.997 0.989 0.916 0.996 0.999 0.999 0.989 0.992 1.000 0.992 0.992 0.981 0.999 0.972 1.000                  |
| P01 0.977 0.967 0.980 0.964 0.961 0.970 0.977 0.757 0.952 0.970 0.974 0.981 0.975 0.978 0.984 0.978 0.975 0.986 0.960 0.859 0.965 0.975 0.976 0.960 0.976 0.979 0.978 0.977 1.000 0.979 0.950 0.977 1.000             |
| P02 0.999 0.994 0.998 0.989 0.992 0.998 0.996 0.782 0.994 0.999 0.995 0.997 0.988 0.998 0.993 0.998 0.999 0.998 0.993 0.924 0.997 1.000 1.000 0.993 0.988 0.999 0.988 0.988 0.980 1.000 0.977 0.999 0.977 1.000       |
| P03 0.975 0.995 0.980 0.939 0.959 0.989 0.956 0.891 0.985 0.986 0.953 0.963 0.941 0.968 0.957 0.982 0.987 0.984 0.995 0.975 0.989 0.980 0.984 0.995 0.938 0.972 0.942 0.942 0.950 0.979 1.000 0.975 0.952 0.979 1.000 |

P04 0.989 1.000 0.992 0.961 0.977 0.997 0.974 0.861 0.992 0.995 0.973 0.980 0.964 0.984 0.977 0.993 0.996 0.994 0.998 0.959 0.996 0.991 0.994 0.998 0.962 0.987 0.965 0.965 0.967 0.990 0.996 0.989 0.967 0.990 0.997 1.000

---
